# Supplementary material for: Ammonium Uptake, Mediated by Ammonium Transporters, Mitigates Manganese Toxicity in Duckweed, Spirodela polyrhiza
Source: MDPI journal article supplement (doi:10.3390/plants12010208), 2023-01-03
Supplement: s1 [file s1]

**Table S1.** List of RT-qPCR primers used for evaluating expression of *AMTs aquaporin* genes in *S. polyrhiza* line NB5548.

| Gene                     | Forward primer       | Reverse primer         | PCR product length, bp |
|--------------------------|----------------------|------------------------|------------------------|
| <i>SpAMT1;1</i>          | GTTCGTCGCTTATCTCATCT | GGAAAAGGAGGTTGTCGGT    | 122                    |
| <i>SpAMT1;2</i>          | TATCTCCTCTTCTCCGCGT  | TTCATGGTGTTCTTGGCCC    | 92                     |
| <i>SpAMT1;3</i>          | ACCCTCTCTTACTACCTTTT | GAATGCCCCACTGGTACAGAA  | 147                    |
| <i>SpAMT2</i>            | TCCTGAACACCAACATCTGC | AGTCCCGTCATCATTCCCT    | 115                    |
| <i>SpTIP2;1</i>          | TCCATGAACCCTGCTCGCT  | GGTAGGCGTAGGTGTAGACAAG | 127                    |
| <i>SpPIP1;2/SpPIP1;3</i> | TCGGCTTCGCAGTGTTCTT  | GGACCTGGACTTGAATGGGA   | 218                    |
| <i>SpPIP2;2</i>          | TCGCCACCATCCCTATCA   | CACCAATGAAAGGCCCTA     | 126                    |
| <i>SpHiston3</i>         | CGCAAGTACCAGAAGAGCAC | CGAAGAGACCCACGAGGTAG   | 160                    |
| <i>SpActin</i>           | TGTTTTCCCAAGTATCGTC  | TCCCAGTTGGTGACGATT     | 153                    |

**Table S2.** List of primer used for cloning *AMT* genes of *S. polyrhiza* ecotype NB5548.

| Gene            | Forward primer      | Reverse primer       | PCR product length, bp |
|-----------------|---------------------|----------------------|------------------------|
| <i>SpAMT1;1</i> | AGAGAAGGGAGATGGCGGA | GAGAGAGAAGGTGGGAAGG  | 1579                   |
| <i>SpAMT1;2</i> | GGAGAGATGGGGGACATGG | AAGATATCGATCGGGCCAC  | 1689                   |
| <i>SpAMT1;3</i> | TCTCTCTGCACCTGTCTT  | ACAGTCCCAGTTGTTCC    | 1453                   |
| <i>SpAMT2</i>   | GTTGGGGTGAAGAGGATGG | AGGGAGAGAGAGAGACTAGA | 1476                   |

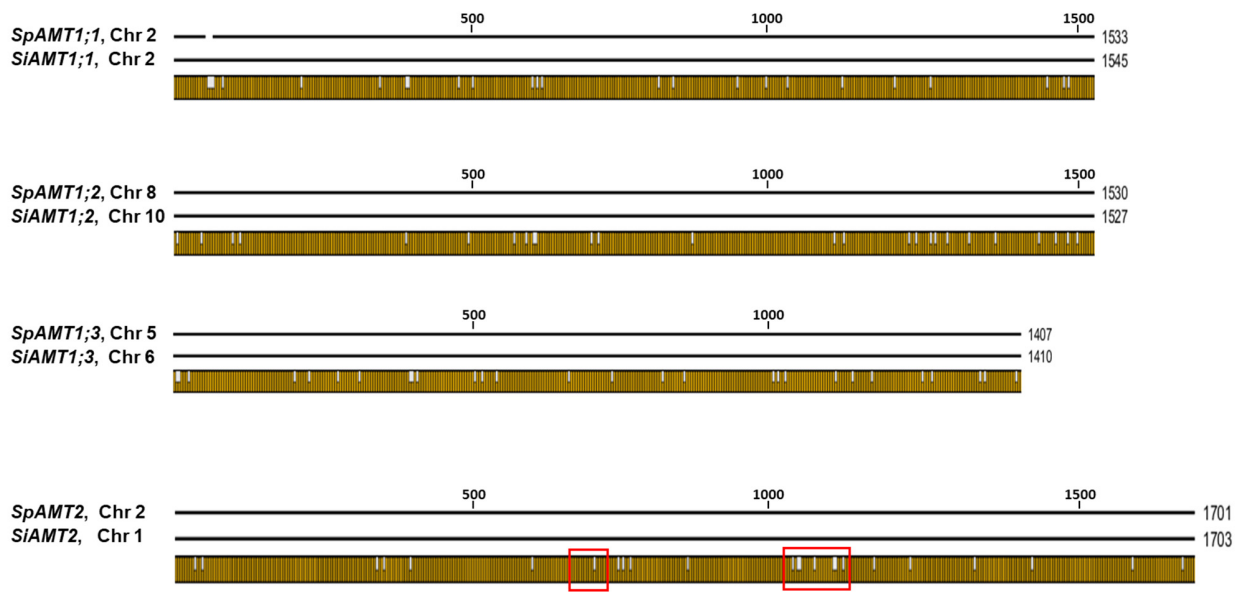

**Figure S1.** Schematic structure of AMT coding regions in genomes of *Spirodela polyrhiza* (*Sp*) and *Spirodela intermedia* (*Si*). Positions of introns in the *SpAMT2* (643-722 and 1010-1185bp) and *SiAMT2* (643-723 and 1011-1187bp) genes are marked by red boxes.

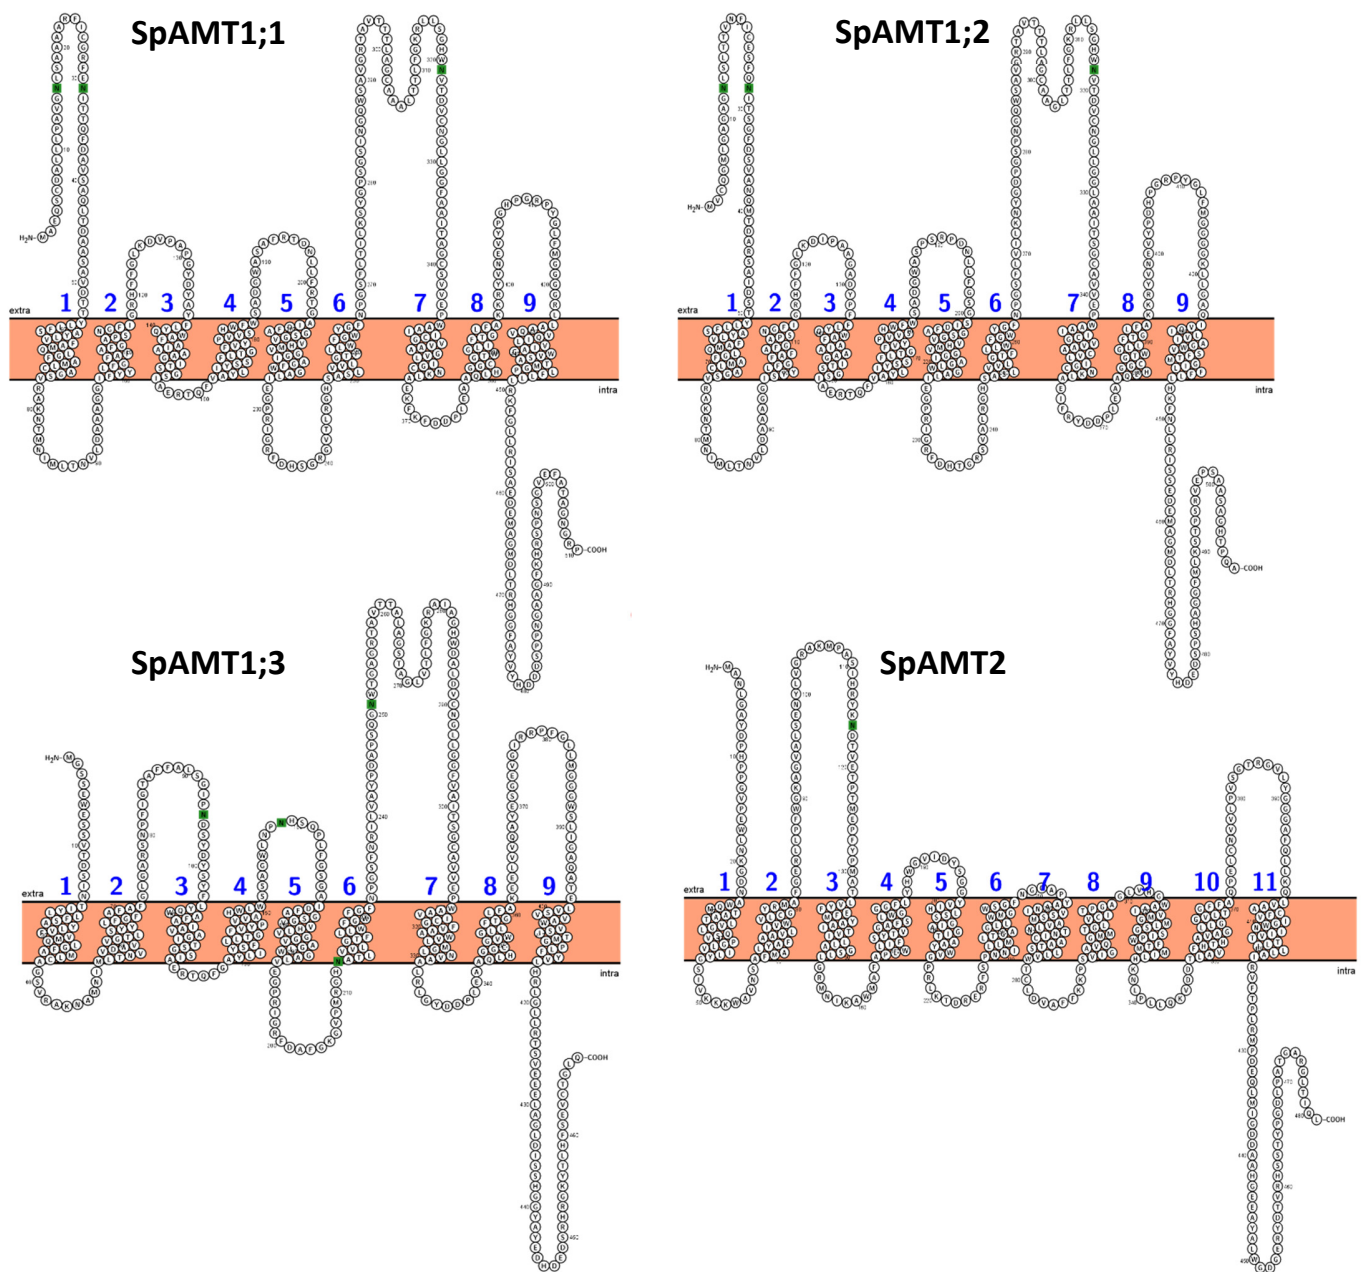

**Figure S2.** Schematic structure of AMTs of *S. polyrhiza*. Images generated by tool *Protter - visualize proteoforms* [45]
